# Supplementary material for: Improving Plasmonic Photothermal Therapy of Lung Cancer Cells with Anti-EGFR Targeted Gold Nanorods
Source: PubMed Central journal article supplement (PMC7407807; doi:10.3390/nano10071307), 2020-07-03
Supplement: nanomaterials-10-01307-s001.pdf [file nanomaterials-10-01307-s001.pdf]

# Supplementary Materials: Improving plasmonic photothermal therapy of lung cancer cells with anti-EGFR targeted gold nanorods

Oscar Knights <sup>1</sup> , Steven Freear <sup>1</sup> and James R. McLaughlan <sup>1,2,\*</sup> 

## 1. Laser type: continuous wave vs pulsed for plasmonic photothermal therapy

There are broadly two categories of lasers used for photothermal therapy: pulsed (PW) and continuous wave (CW). CW lasers emit a continuous beam of light that generally lasts seconds or longer. The laser medium is continuously pumped by another light-source (usually another laser) resulting in the continual excitation of atoms within the lasing medium and the emission of photons [1]. CW lasers are also relatively inexpensive compared with most pulsed laser systems, while also having the advantage of compactness and portability.

High power pulsed lasers (PW), in contrast, are usually complex, bulky systems with multiple components such as gas tanks, movable crystals, and liquid cooling units, requiring longer, more sophisticated calibration and installation times. Unlike CW lasers that have a steady, constant power output, PW lasers frequently have intra-cavity delays that are built into the laser system to enable the build-up and 'storage' of energy in the lasing medium until it is released as a high-intensity burst of light [2]. Since there is a delay between exciting the lasing medium and a light pulse being emitted from the shutter, high power PW lasers can usually only achieve pulse repetition frequencies (PRFs) of around 10 – 20 Hz. The process of rapid accumulation and release of energy in very short, nano- or femto-second pulses is termed "Q-switching" and facilitates the lasers ability to generate extremely high peak powers in the order of  $10^6$  to  $10^9$  Watts. This is because the peak power,  $P_{\text{peak}}$ , is the energy transfer of a single laser pulse, given by,

$$P_{\text{peak}}(W) = \frac{E_{\text{pulse}}}{\tau_p} \quad (1)$$

where  $E_{\text{pulse}}$  is the energy of a single pulse, and  $\tau_p$  is the duration of the pulse. The average power,  $P_{\text{ave}}$ , of a pulsed laser takes into account the time between each pulse by the following equation,

$$P_{\text{ave}}(W) = \frac{E_{\text{pulse}}}{\tau_T} = E_{\text{pulse}} \times \text{PRF}(\text{Hz}) \quad (2)$$

where  $\tau_T = 1/\text{PRF}$  is the time-period of the pulses. This means for a single, 7 ns pulse with an energy of 1 J and PRF = 10 Hz, the peak power is  $143 \times 10^6$  W and the average power is only 10 W. Using equation 2 gives an  $P_{\text{ave}} = 160$  mW for the PW laser and 950 mW for the CW laser.

The fundamental differences between CW and PW lasers lead to significant differences in the way they interact with materials. When a laser interacts with a material, and is absorbed, the energy first excites the conduction electrons and sets them oscillating [3]. This energy is then transferred to the surrounding electrons via femtosecond electron-electron relaxations, before being further transferred to the lattice, via electron-phonon collisions on a picosecond time-scale. When a material absorbs light from a CW laser, the heat is spread out over a much larger volume since the continuous nature of the incoming light allows for the heat to diffuse radially [4]. If the absorbing material is a solution of AuNRs, then this effect will be significantly enhanced as the AuNRs efficiently convert the laser energy into heat [5]. Conversely, under pulsed laser illumination, the short (< 10 ns) high intensity laser pulses induce a higher initial peak temperature in the absorbers, compared with that of CW lasers. However, due to the time period between laser pulses, the absorbing region has time to cool sufficiently before each consecutive pulse. If AuNRs are the absorbing medium, then they will experience extremely high peak temperatures (and the emission of PA signals if the stress confinement condition is met), before rapidly cooling ahead of the next pulse (supplementary figure S1). Thus, two distinct mechanisms

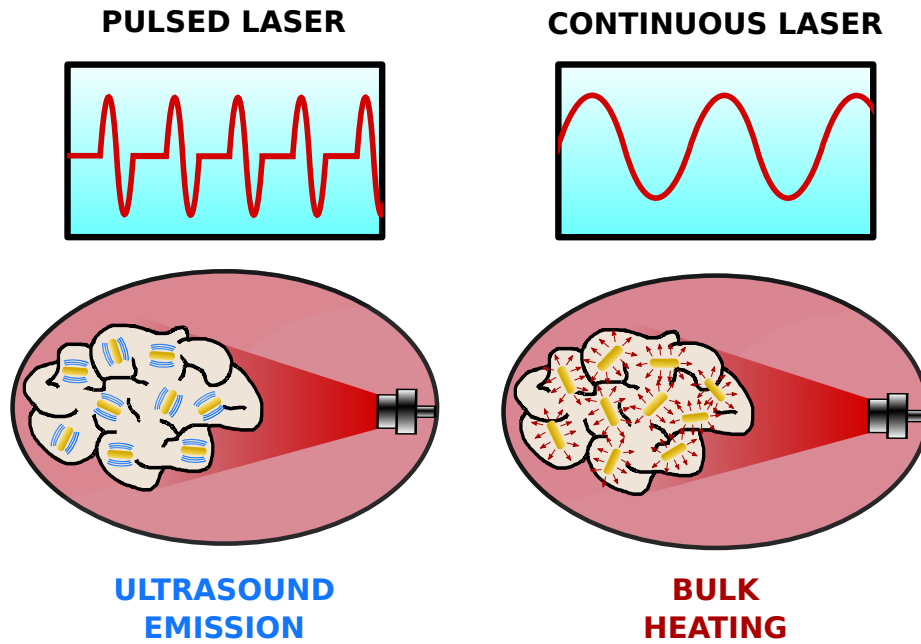

**Figure S1.** Under pulsed laser illumination, the AuNRs located in a tumour will experience a rapid increase in temperature that likely causes an expansion of both the AuNR and the localised surroundings, resulting in the emission of an ultrasonic wave. Conversely, under continuous wave laser illumination, the same AuNRs will continuously radiate heat to the surroundings, causing bulk heating of the environment.

38 exist depending on the type of laser employed: highly localised heating when PW lasers are used,  
 39 and bulk, volumetric heating when CW lasers are used. There are also differences in the guidelines  
 40 for the maximum exposure limit for skin. The maximum permissible exposure (MPE) is governed by  
 41 the optical wavelength,  $\lambda$ , and duration of the laser exposure,  $t(s)$  [6]. Within the wavelength range  
 42  $700 \text{ nm} \leq \lambda \leq 1400 \text{ nm}$ , the MPE for skin is determined by the following,

$$\text{MPE}_{\text{skin}} = \begin{cases} 2 \times 10^{11} C_4 (\text{W m}^{-2}), & \text{if } t(s) < 10^{-9} \\ 200 C_4 (\text{J m}^{-2}), & \text{if } 10^{-9} \leq t(s) \leq 10^{-7} \\ 1.1 \times 10^4 C_4 t(s)^{0.25} (\text{J m}^{-2}), & \text{if } 10^{-7} \leq t(s) \leq 10 \\ 2000 C_4 (\text{W m}^{-2}), & \text{if } 10 \leq t(s) \leq 30000 \end{cases} \quad (3)$$

where  $C_4$  is a wavelength-dependent constant given by,

$$C_4 = \begin{cases} 10^{0.002(\lambda-700)}, & \text{for } 700 \text{ nm} \leq \lambda \leq 1050 \text{ nm} \\ 5, & \text{for } 1050 \text{ nm} \leq \lambda \leq 1400 \text{ nm} \end{cases} \quad (4)$$

43 This relationship between laser wavelength and exposure duration gives rise to a different MPE  
 44 depending on the laser employed. As the length of laser exposure is increased from a nanosecond  
 45 pulse ( $10^{-9}$ ) to a duration of 10 s, the MPE for skin increases from approximately 400 to 38 000  $\text{J m}^{-2}$   
 46 (using equations 3 and 4 with a laser wavelength = 850 nm). This suggests that short pulses of light  
 47 are more damaging to skin than a prolonged energy deposition. For exposures longer than 10 s, the  
 48 defining limit changes from the total energy per unit area delivered to the skin ( $\text{J m}^{-2}$ ) to the total  
 49 power per unit area ( $\text{W m}^{-2}$ ), and becomes a function of wavelength only. As the wavelength is  
 50 increased from 700 to 1400 nm, the MPE for skin increases from approximately 2010 to 10 000  $\text{W m}^{-2}$ ,  
 51 for exposures lasting more than 10 s, indicating that the longer NIR optical wavelengths are less

52 damaging to skin. Since CW lasers are predominately used on the order of minutes (for example in  
53 photothermal therapy), their MPE limits are measured in terms of the total power per unit area, with  
54 a limit of  $MPE_{\text{skin}} = 4000 \text{ W m}^{-2}$  ( $\lambda = 850$ ). However, a PW laser employed for photoacoustics will  
55 operate with a pulse length on the order of a few nanoseconds and therefore its MPE is measured  
56 in terms of the total energy per unit area. For a 7 ns pulse at 850, its  $MPE_{\text{skin}} = 400 \text{ J m}^{-2}$ . While  
57 these guidelines provide a potential upper limit on the safe exposure for skin, they do not cover other  
58 biological tissues (other than ocular exposure) that may be exposed during therapy, such as lung tissue,  
59 and therefore they should be taken as a reference guideline only for future therapeutic development.

60 PPTT is conventionally administered with CW lasers to induce hyperthermia via bulk heating  
61 of a target region. This volumetric elevation in temperature can lead to the death of cells via two  
62 basic pathways: apoptosis and necrosis. Necrosis is the death of cells related to injury, disease, or low  
63 blood supply, and typically results in the loss of membrane integrity and the uncontrolled release of  
64 intracellular material into the surroundings [7]. Apoptosis differs from necrosis in that it is a form of  
65 controlled cell death, where a series of specific cellular biochemical and morphological events occur  
66 that ultimately lead to the 'programmed' elimination of ageing, superfluous, or damaged cells [8].  
67 This method for cell death is a natural way for the body to eliminate unwanted or unneeded cells that  
68 are no longer operating as normal. If cells experience an apoptotic death, then no immunogenic or  
69 inflammatory response will be observed [9]. Conversely, if cells are destroyed via a necrotic pathway,  
70 then the release of cellular contents will initiate an inflammatory response. The cellular mechanisms  
71 and processes that govern necrosis and apoptosis have been discussed in great detail in the literature  
72 and so will not be discussed here [10,11].

73 With regards to laser-based therapies, the conditions that influence whether cells undergo either  
74 necrosis or apoptosis vary based on the laser exposure parameters and whether absorbing agents,  
75 such as AuNRs, are used. It has been shown that the threshold for apoptosis and necrosis of human  
76 prostate cancer cells is between  $44^\circ\text{C}$  or  $45^\circ\text{C}$  when maintained at this temperature for 120 min [12].  
77 However, this study was not performed using a laser as the heating source and instead was conducted  
78 by placing a 96-well plate onto a pre-heated hotplate for heating. This method for applying heat  
79 may result in a different temperature profile compared with that of a laser, and so comparisons must  
80 be made with caution. Another more recent study investigated CW laser-induced cell-death of a  
81 murine melanoma cell line that was incubated with AuNRs and exposed to 15 min laser irradiation  
82 [13]. It was found that, when heated to a maximum of  $43^\circ\text{C}$  after 15 min laser exposure, the majority  
83 of the cells survived. However, when temperatures between  $43 - 49^\circ\text{C}$  were reached, significant  
84 cell death was observed (approximately 80%) and the primary mechanism was apoptosis. Above  
85  $49^\circ\text{C}$ , necrosis became the leading cause of cell death. This study was consistent with previous  
86 reports on temperature thresholds, where temperatures above  $50^\circ\text{C}$  were shown to induce necrosis,  
87 and temperatures below this threshold primarily induced apoptosis [14,15]. The strong temperature  
88 dependence on the mechanisms for cell-death give rise to the ability for CW lasers to selectively destroy  
89 tissues via either the necrotic or apoptotic pathways, by simply controlling laser exposure parameters.

90 Unlike CW lasers, PW lasers do not induce bulk temperature changes in an absorbing region, and  
91 therefore the mechanisms for destroying tissue are different. The absorption of high-intensity light  
92 pulses likely result in the destruction of tissue via mechanical stresses and bubble cavitation [16,17].  
93 As a result of this, pulsed-wave plasmonic photothermal therapy (PW-PPTT) (a.k.a. photoacoustic  
94 therapy) can only induce necrotic cell-death, since the mechanical stresses destroy the cells likely by  
95 disrupting the cell membrane and releasing the intracellular contents into the surroundings.

96 Although apoptosis is generally preferred over necrosis, due to the lack of immunogenic or  
97 inflammatory response, cell-death via necrosis has its potential benefits, such as the immediacy of the  
98 killing effect, no risks associated with cancer cells developing resistance to the therapy [18], increased  
99 selectivity as a result of no heat conducting from the target site and damaging surrounding healthy  
100 tissues, potentially lower laser powers compared with CW lasers, and the ability for the generated PA  
101 signals to provide simultaneous imaging during treatment [19]. Furthermore, PW-PPTT may enable

102 the ability to combine PAI with PPTT through the use of PW lasers, and incorporate a single laser  
103 system into already existing medical technologies [20], ultimately improving patient outcome and  
104 treatment efficiency.

105

- 106 1. Paschotta, R. *Field Guide to Lasers*; SPIE Press Book, 2008.
- 107 2. Siegman, A. *Lasers*; University Science Books, 1986.
- 108 3. Han, J.; Li, Y. *Lasers - Applications in Science and Industry*; InTech, 2011.
- 109 4. Harris-Birtill, D.; Singh, M.; Zhou, Y.; Shah, A.; Ruenraroengsak, P.; Gallina, M.E.; Hanna, G.B.; Cass, A.E.;  
110 Porter, A.E.; Bamber, J.; others. Gold nanorod reshaping in vitro and in vivo using a continuous wave laser.  
111 *PLoS one* **2017**, *12*, e0185990.
- 112 5. Jain, S.; Hirst, D.; O'sullivan, J. Gold nanoparticles as novel agents for cancer therapy. *The British journal of*  
113 *radiology* **2012**, *85*, 101–113.
- 114 6. American National Standard for Safe Use of Lasers. ANSI. *ANSI* **2014**, *Z136.1*.
- 115 7. Niemann, B.; Rohrbach, S. Metabolically Relevant Cell Biology–Role of Intracellular Organelles for Cardiac  
116 Metabolism. In *The Scientist's Guide to Cardiac Metabolism*; Elsevier, 2016; pp. 19–38.
- 117 8. Tanase, C.P.; OGREZEANU, I.; BADIU, C. 5 - Apoptosis. In *Molecular Pathology of Pituitary Adenomas*; Tanase,  
118 C.P.; OGREZEANU, I.; BADIU, C., Eds.; Elsevier: London, 2012; pp. 45 – 52.
- 119 9. Pérez-Hernández, M.; del Pino, P.; Mitchell, S.G.; Moros, M.; Stepien, G.; Pelaz, B.; Parak, W.J.; Gálvez,  
120 E.M.; Pardo, J.; de la Fuente, J.M. Dissecting the molecular mechanism of apoptosis during photothermal  
121 therapy using gold nanoprisms. *ACS nano* **2014**, *9*, 52–61.
- 122 10. Kroemer, G.; Dallaporta, B.; Resche-Rigon, M. The mitochondrial death/life regulator in apoptosis and  
123 necrosis. *Annual review of physiology* **1998**, *60*, 619–642.
- 124 11. Kiraz, Y.; Adan, A.; Yandim, M.K.; Baran, Y. Major apoptotic mechanisms and genes involved in apoptosis.  
125 *Tumor Biology* **2016**, *37*, 8471–8486.
- 126 12. Song, A.S.; Najjar, A.M.; Diller, K.R. Thermally induced apoptosis, necrosis, and heat shock protein  
127 expression in three-dimensional culture. *Journal of biomechanical engineering* **2014**, *136*, 071006.
- 128 13. Zhang, Y.; Zhan, X.; Xiong, J.; Peng, S.; Huang, W.; Joshi, R.; Cai, Y.; Liu, Y.; Li, R.; Yuan, K.; others.  
129 Temperature-dependent cell death patterns induced by functionalized gold nanoparticle photothermal  
130 therapy in melanoma cells. *Scientific reports* **2018**, *8*, 8720.
- 131 14. Huang, X.; Jain, P.K.; El-Sayed, I.H.; El-Sayed, M.A. Determination of the minimum temperature required  
132 for selective photothermal destruction of cancer cells with the use of immunotargeted gold nanoparticles.  
133 *Photochemistry and photobiology* **2006**, *82*, 412–417.
- 134 15. Ali, M.R.; Rahman, M.A.; Wu, Y.; Han, T.; Peng, X.; Mackey, M.A.; Wang, D.; Shin, H.J.; Chen, Z.G.; Xiao,  
135 H.; others. Efficacy, long-term toxicity, and mechanistic studies of gold nanorods photothermal therapy of  
136 cancer in xenograft mice. *Proceedings of the National Academy of Sciences* **2017**, *114*, E3110–E3118.
- 137 16. Pitsillides, C.M.; Joe, E.K.; Wei, X.; Anderson, R.R.; Lin, C.P. Selective Cell Targeting with  
138 Light-Absorbing Microparticles and Nanoparticles. *Biophysical Journal* **2003**, *84*, 4023 – 4032.  
139 doi:http://dx.doi.org/10.1016/S0006-3495(03)75128-5.
- 140 17. Tong, L.; Zhao, Y.; Huff, T.B.; Hansen, M.N.; Wei, A.; Cheng, J.X. Gold nanorods mediate tumor cell death  
141 by compromising membrane integrity. *Advanced Materials* **2007**, *19*, 3136–3141.
- 142 18. Melamed, J.R.; Edelman, R.S.; Day, E.S. Elucidating the fundamental mechanisms of cell death triggered  
143 by photothermal therapy. *ACS nano* **2015**, *9*, 6–11.
- 144 19. Zhong, J.; Wen, L.; Yang, S.; Xiang, L.; Chen, Q.; Xing, D. Imaging-guided high-efficient photoacoustic  
145 tumor therapy with targeting gold nanorods. *Nanomedicine: Nanotechnology, Biology and Medicine* **2015**,  
146 *11*, 1499–1509.
- 147 20. Knights, O.B.; Ye, S.; Ingram, N.; Freear, S.; McLaughlan, J.R. Optimising gold nanorods for photoacoustic  
148 imaging in vitro. *Nanoscale Advances* **2019**.
